# Supplementary material for: An Integrated Decision Support Framework for Sustainable Road Planning in Biodiversity Hotspots
Source: Research Square preprint supplement (doi:10.21203/rs.3.rs-7419361/v1), 2025-09-22
Supplement: Supplementary file 1 [file da08143b7a7c73e390ecd070.docx]

**Supplementary Materials: Balancing Development and Conservation: A Decision Framework for Sustainable Road Planning in Biodiversity Hotspots**

**Authors:** Philipo Jacob Mtweve*, Abraham Eustace, Qambemeda Masala Nyanghura, Vincent Moseti, Tanja Kramm, Pierre Ibisch, Lisa Biber-Freudenberger

**Table of Contents**

S1. Complete Literature Review, Route Specifications, and Historical Context
S2. Complete Stakeholder Engagement Protocols and Materials
S3. Complete MCDA Protocols, Spatial Analysis, and Sensitivity Analysis
S4. Complete Bayesian Belief Network Development Protocols
S5. Complete Temporal Analysis and Cross-Validation Protocols
S6. Extended Results and Comprehensive Analysis Tables
S7. Extended Sensitivity Analysis and Robustness Testing
S8. Data Availability, Code Repository, and Reproducibility Guidelines

**S1. Complete Literature Review, Route Specifications, and Historical Context**

**S1.1 Systematic Literature Search and Synthesis**

Our systematic literature review employed multiple databases and structured search strategies to identify all relevant studies on road infrastructure impacts in the Greater Serengeti Ecosystem and analogous East African systems.

**Search Protocol:**

- **Databases:** Web of Science, PubMed, Google Scholar, African Journals Online, JSTOR
- **Database Searches**: Web of Science, PubMed, Google Scholar, and African Journals Online Search Terms: ("Serengeti" OR "Greater Serengeti" OR "Ngorongoro" OR "Maswa" OR "Ikorongo" OR "Grumeti" OR "Loliondo") AND ("road" OR "infrastructure" OR "highway") AND ("wildlife" OR "conservation" OR "development" OR "ecosystem" OR "migration") Time Period: 1990-2023 Language: English publications only Quality Criteria: Peer-reviewed publications, gray literature from authoritative sources (government reports, UN agencies, established NGOs). Exclusion Criteria: Opinion pieces without empirical data, conference abstracts without full papers

**S1.2 Complete Bibliography (47 Studies Used in Literature Review)**

1. Baird, T.D., Leslie, P.W. (2013). Conservation as disturbance: Upheaval and livelihood diversification near Tarangire National Park, northern Tanzania. Global Environmental Change, 23(5), 1131-1141. DOI: 10.1016/j.gloenvcha.2013.05.002.
2. Burgoyne, C., & Mearns, K. (2016). Managing stakeholder relations, natural resources and tourism: A case study from Ololosokwan, Tanzania. Tourism Management, 17(1). DOI: 10.1177/1467358416639088.
3. Charnley, S. (2005). From nature tourism to ecotourism? The case of the Ngorongoro Conservation Area, Tanzania. Human Organization, 64(1), 75-88. DOI: 10.17730/humo.64.1.u8fer0aap3ceg4a1.
4. Chruszcz, B., Clevenger, L.A., Gunson, K., & Gibeau, M.L. (2003). Relationships among grizzly bears, highways, and habitat in the Banff-Bow Valley, Alberta, Canada. Canadian Journal of Zoology, 81, 1378-1391.
5. Dobson, A.P., Borner, M., Sinclair, A.R.E., Hudson, P.J., Anderson, T.M., Bigurube, G., Davenport, T.B.B., Deutsch, J., Durant, S.M., Estes, R.D., Estes, A.B., Fryxell, J., Foley, C., Gadd, M.E., Haydon, D., Holdo, R., Holt, R.D., Homewood, K., Hopcraft, J.G.C., Hilborn, R., Jambiya, G.L.K., Laurenson, M.K., Melamari, L., Morindat, A.O., Ogutu, J.O., Schaller, G., Wolanski, E. (2010). Road will ruin Serengeti. Nature, 467, 272-273. DOI: 10.1038/467272a.
6. Emerton, L., & Mfunda, I. (1999). Making wildlife economically viable for communities living around the western Serengeti, Tanzania. International Institute for Environment and Development (IIED), London.
7. Estes, A.B., Kuemmerle, T., Kushnir, H., Radeloff, V.C., Shugart, H.H. (2012). Land-cover change and human population trends in the greater Serengeti ecosystem from 1984-2003. Global Ecology and Biogeography.
8. Field, C.R., Moll, G., ole Sonkoi, C. (1997). Livestock development in Ngorongoro Conservation Area. In Thompson, D.M. (Ed.), Multiple land use: The experience of the Ngorongoro Conservation Area, Tanzania (pp. 181-199).
9. Fyumagwa, R., Gereta, E., Hassan, S., Kideghesho, J.R., Kohi, E.M., Keyyu, J., Magige, F., Mfunda, I.M., Mwakatobe, A., Ntalwila, J., Nyahongo, J.W., Runyoro, V., Røskaft, E. (2013). Roads as a threat to the Serengeti ecosystem. Conservation Biology, 27, 1122-1125. DOI: 10.1111/cobi.12116.
10. Holdo, R.M., Fryxell, J.M., Sinclair, A.R.E., Dobson, A., Holt, R.D. (2011). Predicted impact of barriers to migration on the Serengeti wildebeest population. PLOS ONE, 6, e16370. DOI: 10.1371/journal.pone.0016370.
11. Homewood, K., Kristjanson, P., & Chenevix Trench, P. (2009). Staying Maasai? Livelihoods, Conservation and Development in East African Rangelands. New York: Springer.
12. Homewood, K., Lambin, E.F., Coast, E., Kariuki, A., Kikula, I., Kivelia, J., Said, M., Serneels, S., Thompson, M. (2001). Long-term changes in Serengeti-Mara wildebeest and land cover: Pastoralism, population, or policies? Proceedings of the National Academy of Sciences (PNAS).
13. Hopcraft, J.G.C., Mduma, S.A.R., Borner, M., Bigurube, G., Kijazi, A., Haydon, D.T., Wakilema, W., Rentsch, D., Sinclair, A.R.E., Dobson, A., Lembeli, J.D. (2015). Conservation and economic benefits of a road around the Serengeti: Benefits of a road around the Serengeti. Conservation Biology, 29, 932-936. DOI: 10.1111/cobi.12470.
14. Kariuki, R., Capitani, C., Munishi, L., Marchant, R. (2022). Serengeti's futures: Exploring land use and land cover change scenarios to craft pathways for meeting conservation and development goals. Frontiers in Conservation Science. DOI: 10.3389/fcosc.2022.920143.
15. Kariuki, R.W., Munishi, L.K., Courtney-Mustaphi, C.J., Capitani, C., Shoemaker, A., Lane, P.J., Marchant, R. (2021). Integrating stakeholders' perspectives and spatial modelling to develop scenarios of future land use and land cover change in northern Tanzania. PLOS ONE. DOI: 10.1371/journal.pone.0245516.
16. Kideghesho, J., Rija, A., Mwamende, K., Selemani, I. (2013). Emerging issues and challenges in conservation of biodiversity in the rangelands of Tanzania. Nature Conservation, 6, 1-29. DOI: 10.3897/natureconservation.6.5407.
17. Kideghesho, J.R. (2010). 'Serengeti shall not die': transforming an ambition into a reality. Tropical Conservation Science, 3(3), 228-248.
18. Kideghesho, J.R., Nyahongo, J.W., Hassan, S.N., Tarimo, T.C., Mbije, N.E. (2006). Factors and ecological impacts of wildlife habitat destruction in the Serengeti Ecosystem in Northern Tanzania. African Journal of Environmental Assessment and Management, 11, 917-932.
19. Kija, H.K., Ogutu, J.O., Mangewa, L.J., Bukombe, J., Verones, F., Graae, B.J., Kideghesho, J.R., Said, M.Y., Nzunda, E.F. (2020). Land use and land cover change within and around the Greater Serengeti Ecosystem, Tanzania. American Journal of Remote Sensing.
20. Kija, H.K., Ogutu, J.O., Mangewa, L.J., Bukombe, J., Verones, F., Graae, B.J., Kideghesho, J.R., Said, M.Y., Nzunda, E.F. (2020). Spatio-temporal changes in wildlife habitat quality in the Greater Serengeti Ecosystem. Sustainability.
21. Kioko, J., Kiffner, C., Jenkins, N., & Collinson, W.J. (2015). Wildlife roadkill patterns on a major highway in northern Tanzania. African Zoology, 50(1), 17-22. DOI: 10.1080/15627020.2015.1021161.
22. Kisingo, A., Rollins, R., Murray, G., Dearden, P. (2022). Evaluating 'good governance': The development of a quantitative tool in the Greater Serengeti Ecosystem. Journal of Environmental Management.
23. Kleinschroth, F., Healey, J.R. (2017). Impacts of logging roads on tropical forests. Biotropica, 49, 620-635. DOI: 10.1111/btp.12462.
24. Knapp, E.J., Rentsch, D., Schmitt, J., Knapp, L.M. (2015). The plight of the people: Understanding the social-ecological context of people living on the western edge of Serengeti National Park. In Serengeti IV (pp. 1-30). DOI: 10.7208/chicago/9780226196336.003.0016.
25. Koskei, A., Glyptou, K. (2025). The multiple land use dilemmas of the Ngorongoro Biosphere Reserve. DOI: 10.1080/14616688.2025.2500965.
26. Mahulu, A., Senzota, R., & Magige, F. (2015). Diversity of large mammals along the proposed road across Northern Serengeti, Tanzania. Journal of Zoological and Bioscience Research, 2(3), 18-24.
27. May, R., Jackson, C., Bevanger, K., Røskaft, E. (2019). Servicescape of the Greater Serengeti-Mara Ecosystem: Visualizing the linkages between land use, biodiversity and the delivery of wildlife-related ecosystem services. Ecosystem Services, 40, 101025. DOI: 10.1016/j.ecoser.2019.101025.
28. McCabe, J., Perkin, S., Schofield, C. (1992). Can conservation and development be coupled among pastoral people? An examination of the Maasai of the Ngorongoro Conservation Area, Tanzania. Human Organization, 51(4), 353-366. DOI: 10.17730/humo.51.4.d20010q600v50240.
29. Mtweve, P., Moseti, V., Mahmoud, N., Kramm, T., Bogner, C., Ibisch, P., Biber-Freudenberger, L. (2025). Exploring socioeconomic and environmental impacts of road infrastructure development in Sub-Saharan Africa: A systematic literature review. Environmental Development, 54, 101177. DOI: 10.1016/j.envdev.2025.101177.
30. Mwampeta, S.B., Bjørå, C.S., Kohi, E.M., Mlingi, V., Fyumagwa, R., Holmern, T., Røskaft, E. (2024). The human and financial costs of conservation for local communities living around the Greater Serengeti Ecosystem, Tanzania. Global Ecology and Conservation.
31. Myers, N., Mittermeier, R.A., Mittermeier, C.G., Da Fonseca, G.A.B., Kent, J. (2000). Biodiversity hotspots for conservation priorities. Nature, 403, 853-858. DOI: 10.1038/35002501.
32. Newmark, W.D., Boshe, J.I., Sariko, H.I., & Makumbule, G.K. (1996). Effects of a highway on large mammals in Mikumi National Park, Tanzania. African Journal of Ecology, 34, 15-31.
33. Nzioka, J., Houehounha, D., Moukala, E. (2023). Managing the migration – Maasai Mara National Reserve and Serengeti World Heritage Site connectivity. In Managing Transnational UNESCO World Heritage Sites in Africa (pp. 1-10). DOI: 10.1007/978-3-030-80910-2_1.
34. Ojija, F., Swai, E.E., Mwakalapa, E.B., Mbije, N.E.J. (2024). Impacts of emerging infrastructure development on wildlife species and habitats in Tanzania. Journal of Wildlife and Biodiversity, 8(2), 365-384. DOI: 10.5281/zenodo.11106542.
35. Raphael, L.J. (2018). Vegetation land cover/use dynamics and their effects in Mbulu and Karatu Districts in the North-Eastern Highlands of Tanzania. Environmental Science, Geography.
36. Sangiwa, M.W., & Magige, F.J. (2019). Effects of roads on small mammal diversity and abundance in the northern Serengeti, Tanzania. African Journal of Ecology, 57(4), 525-534. DOI: 10.1111/aje.12637.
37. Sinclair, A.R.E. (1981). Serengeti – Dynamics of an ecosystem. Journal of Applied Ecology, 18(3), 68. DOI: 10.2307/2402507.
38. Sinclair, A.R.E., & Arcese, P. (Eds.). (1995). Serengeti II: Dynamics, Management, and Conservation of an Ecosystem. University of Chicago Press.
39. Sinclair, A.R.E., Packer, C., Mduma, S.A.R., & Fryxell, J.M. (Eds.). (2008). Serengeti III: Human Impacts on Ecosystem Dynamics. University of Chicago Press.
40. Sinclair, A.R.E., Metzger, K.L., Mduma, S.A.R., Fryxell, J.M. (2015). Serengeti IV: Sustaining biodiversity in a coupled human-natural system. University of Chicago Press. DOI: 10.7208/chicago/9780226196336.001.0001.
41. Spellerberg, I.F. (1998). Ecological effects of roads and traffic: A literature review. Global Ecology and Biogeography Letters, 7(5), 317-333.
42. Tarimo, M., Wondimu, P., Odeck, J., Lohne, J., & Lædre, O. (2017). Sustainable roads in Serengeti National Park: gravel roads construction and maintenance. Procedia Computer Science, 121, 329-336. DOI: 10.1016/j.procs.2017.11.045.
43. Torres, A., Jaeger, J.A.G., Alonso, J.C. (2016). Assessing large-scale wildlife responses to human infrastructure development. Proceedings of the National Academy of Sciences, 113, 8472-8477. DOI: 10.1073/pnas.1522488113.
44. Veldhuis, M.P., Ritchie, M.E., Ogutu, J.O., Morrison, T.A., Beale, C.M., Estes, A.B., Mwakilema, W., Ojwang, G.O., Parr, C.L., Probert, J., Wargute, P.W., Hopcraft, J.G.C. (2019). Cross-boundary human impacts compromise the Serengeti-Mara ecosystem. Science, 363(6434), 1424-1428. DOI: 10.1126/science. aav0564.
45. Walelign, S.Z., Nielsen, M.R., Jacobsen, J.B. (2019). Roads and livelihood activity choices in the Greater Serengeti Ecosystem, Tanzania. PLOS ONE, 14(3), 1-21. DOI: 10.1371/journal.pone.0213089.
46. World Bank. (2019). Tanzania: Country environmental analysis – environmental trends and threats, and pathways to improved sustainability. Washington, DC: World Bank.
47. Zella, A.Y. (2016). The management of protected areas in the Serengeti ecosystem: A case study of Ikorongo and Grumeti Game Reserves (IGGRs). Department of Economic Studies, The Mwalimu Nyerere Memorial Academy (MNMA)-Zanzibar.

**Study Quality Distribution:**

- High-impact journals (Nature, Science, PNAS): 5 studies
- Conservation journals (Conservation Biology, etc.): 12 studies
- Regional African journals: 8 studies
- Ecosystem-specific studies (Serengeti series): 4 studies
- Grey literature and reports: 6 studies
- Comparative international studies: 5 studies
- Methodological reviews: 7 studies

**S1.3 Detailed Route Specifications and Technical Characteristics**

**Northern Route (Musoma-Serengeti-Arusha)**

- **Total Length:** 342 km
- **Proposed Start Date:** 1995 (Ministry of Works and Transport proposal)
- **Design Standards:** Class II bitumen surface, 7m carriageway width
- **Major Engineering Challenges:**
  - Mbalageti River crossing (450m bridge required)
  - Escarpment descent (12% gradient over 8km section)
  - Seasonal flooding areas (15km elevated causeway sections)
- **Environmental Constraints:**
  - Crosses 8 designated wildlife corridors
  - Intersects wildebeest calving grounds (February-May)
  - Requires 12 major animal crossing structures
- **Population Served:** 2.1 million within 50km corridor
- **Estimated Construction Cost:** $1.30 billion total ($3.80 million/km)

**Serengeti Route (Direct Protected Area Crossing)**

- **Total Length:** 287 km
- **Proposed Start Date:** 2008 (Tourism industry stakeholders)
- **Design Standards:** Class III gravel surface, 6m carriageway width
- **Major Engineering Features:**
  - Seronera Valley crossing (geology requires deep foundations)
  - Moru Kopjes navigation (cultural site avoidance)
  - Grumeti River bridges (3 major crossings)
- **Environmental Constraints:**
  - 198.9 km within protected area boundaries
  - Mandatory 30-50 km/hr speed limits
  - Year-round wildlife monitoring requirements
- **Population Served:** 971,000 within 50km corridor
- **Estimated Construction Cost:** $1.29 billion total ($4.50 million/km)

**Eyasi Route (Southern Trajectory)**

- **Total Length:** 398 km
- **Proposed Start Date:** 2012 (Tanzania National Parks-Regional Committees collaboration)
- **Design Standards:** Class II bitumen surface, 7m carriageway width
- **Major Engineering Features:**
  - Lake Eyasi causeway (8km elevated section)
  - Rift Valley escarpment climb (engineered switchbacks)
  - Highland forest section (environmental controls)
- **Environmental Advantages:**
  - Maintains 15km minimum distance from core protected areas
  - Strategic wildlife crossing locations (6 planned structures)
  - Integration with existing community conservancies
- **Population Served:** 847,000 within 50km corridor
- **Estimated Construction Cost:** $1.25 billion total ($3.14 million/km)

**Mbulu Route (Southeastern Boundary)**

- **Total Length:** 445 km
- **Proposed Start Date:** 2015 (Conservation organizations and CBNRMs)
- **Design Standards:** Class II bitumen surface, 7m carriageway width
- **Major Engineering Challenges:**
  - Highest elevation route (2,350m maximum altitude)
  - Complex volcanic geology (specialized foundation requirements)
  - Extended rural sections (limited existing infrastructure)
- **Environmental Advantages:**
  - Complete protected area avoidance
  - Follows traditional trade routes (minimal new habitat disruption)
  - Connects existing community conservation areas
- **Population Served:** 682,000 within 50km corridor
- **Estimated Construction Cost:** $1.09 billion total ($2.45 million/km)

**S1.4 Historical Development Context and Stakeholder Evolution**

**1990-2000: Initial Planning Phase** the Northern route emerged from Tanzania's National Transport Policy (1995) emphasizing regional economic integration. Initial feasibility studies by the Ministry of Works and Transport focused primarily on engineering costs and travel time reduction, with limited environmental consideration. Early Environmental Impact Assessments (completed 1998) identified potential wildlife impacts but treated them as manageable through mitigation measures.

**2000-2010: Conservation Concerns Emerge** Growing scientific evidence of road impacts on wildlife migration led to increased conservation advocacy. Key publications (Sinclair et al. 2007, Thirgood et al. 2004) demonstrated quantitative relationships between infrastructure and wildlife population dynamics. Tourism industry stakeholders proposed the Serengeti route (2008) arguing for direct access to tourist facilities, while conservation organizations began advocating for alternative approaches.

**2010-2020: Integrated Planning Development** The period saw increased recognition of planning limitations and stakeholder conflicts. Multiple studies (Dobson et al. 2010, Holdo et al. 2011, Fyumagwa et al. 2013) provided quantitative evidence of potential impacts, while economic analyses (Hopcraft et al. 2015) demonstrated trade-offs between connectivity and ecosystem service values. This period saw emergence of collaborative planning processes leading to the Eyasi route proposal (2012) and community-based Mbulu route advocacy (2015).

**2020-Present: Decision Framework Needs** Current planning context reflects recognition that traditional approaches have failed to resolve stakeholder conflicts or provide clear decision guidance. Multiple route proposals remain under active consideration, with different government agencies, development partners, and stakeholder groups advocating different approaches. This situation created the need for systematic decision-support frameworks capable of integrating multiple perspectives and quantifying trade-offs.

**S2. Complete Stakeholder Engagement Protocols and Materials**

**S2.1 Participant Selection and Recruitment Framework**

**Selection Criteria Development** Stakeholder identification employed systematic power-interest matrix analysis combined with snowball sampling to ensure comprehensive representation. Initial mapping identified 47 potential participants across six categories, refined to 30 participants (14 for expert consultation, 16 for workshops) based on selection criteria balancing expertise, representativeness, and practical participation constraints.

**Tourism Operators Selection Criteria:**

- Annual revenue >$500 (ensuring significant economic stakes)
- Operations in GSE for >10 years (experience with ecosystem dynamics)
- Employment >50 people (community economic impact)
- Mixed international/domestic markets (diverse perspectives)
- **Selected Participants:** Serengeti Balloon Safaris Ltd., Grumeti Reserves

**Planning Officers Selection Criteria:**

- Regional or district level responsibility (strategic influence)
- Infrastructure planning experience >5 years (technical competence)
- Direct GSE jurisdiction (spatial relevance)
- **Selected Participants:** Mara Regional Secretariat (2), Arusha Regional Development Office (1), Simiyu District Council (1)

**Field Ecologists Selection Criteria:**

- PhD level education (technical expertise)
- GSE research experience >5 years (ecosystem knowledge)
- Publication record in peer-reviewed journals (scientific credibility)
- **Selected Participants:** TAWIRI Senior Research Scientist, Frankfurt Zoological Society Research Coordinator

**Road Engineers Selection Criteria:**

- Professional certification (technical competence)
- Rural road construction experience (relevant expertise)
- East African project portfolio (regional context)
- **Selected Participants:** Ministry of Works regional engineers (2), consultant engineers from infrastructure firms (2)

**Community Representatives Selection Criteria:**

- Elected leadership positions (legitimacy)
- Communities within 20km of proposed routes (direct impact)
- Gender balance (inclusive representation)
- **Selected Participants:** Pastoralist Council of Tanzania representative, Village Government chairpersons (2)

**Conservation NGO Selection Criteria:**

- Technical capacity (analytical competence)
- Regional presence >10 years (established relationships)
- Policy influence (strategic impact)
- **Selected Participants:** WWF-Tanzania Senior Program Officer, African Wildlife Foundation Regional Director

**S2.2 Complete Workshop Protocols and Materials**

**Pre-Workshop Preparation** All participants received materials package 2 weeks prior to workshop including: background briefing document (15 pages covering GSE context, route proposals, methodology overview), route maps with technical specifications, literature summary of key research findings, and methodology primers on MCDA and BBN approaches.

**Day 1: Criteria Development and Framework Establishment**

*Session 1A: Opening and Context Setting (60 minutes)*

- Welcome and introductions with organizational affiliations
- GSE overview presentation with ecological and socioeconomic context
- Route proposal presentations (15 minutes each) by proponents
- Question and answer session for clarification

*Session 1B: Individual Criteria Brainstorming (30 minutes)*

- Structured individual exercise: "What factors should influence road route selection in the GSE?"
- Participants generate 8-12 criteria using provided worksheets
- Criteria organized by categories (environmental, social, economic, technical, political)
- Individual explanations captured through brief interviews

*Session 1C: Small Group Synthesis (90 minutes)*

- Mixed-sector groups of 4-5 participants
- Groups create consolidated criteria lists using sticky-note mapping
- Large-format charts (A1 size) for visual organization
- Groups develop operational definitions for each criterion
- Preliminary indicators and measurement approaches identified

***Session 1D: Plenary Integration (120 minutes)***

- Each group presents criteria framework (15 minutes’ presentation + 10 minutes’ discussion)
- Facilitated discussion to identify commonalities and differences
- Voting process to prioritize criteria for detailed development
- Initial framework consensus with 16 criteria across 4 domains
- Documentation of alternative viewpoints and unresolved issues

**Day 2: Weight Estimation and Preference Quantification**

*Session 2A: AHP Training and Methodology (120 minutes)*

- Theoretical presentation: MCDA principles and AHP methodology
- Worked example using familiar local infrastructure decision
- Practice exercise: prioritizing selection criteria
- Introduction to consistency checking and interpretation
- Individual question resolution and method clarification

*Session 2B: Individual AHP Implementation (300 minutes with breaks)*

- Domain-level pairwise comparisons using standardized forms
- Individual consultation available for methodology questions
- Indicator-level comparisons within each domain
- Consistency checking using Expert Choice software
- Iterative refinement for participants with CR > 0.1
- Documentation of reasoning for major preference differences
- Confidence assessment for each comparison

*Session 2C: Group Weight Synthesis and Discussion (60 minutes)*

- Individual weight presentation and explanation
- Discussion of major differences and underlying values
- Geometric mean aggregation for final group weights
- Sensitivity analysis preview for alternative approaches

**Day 3: Bayesian Network Development and Parameter Estimation**

*Session 3A: Network Structure Development (180 minutes)*

- Presentation: BBN principles and causal thinking
- Individual variable identification (15 minutes)
- Small group causal mapping using large-format charts and sticky notes
- Systematic relationship validation using criteria:
  - Logical consistency: Does the causal relationship make mechanistic sense?
  - Empirical support: Is there literature or experience evidence?
  - Expert consensus: Do multiple participants agree on the relationship?
- Network simplification to ensure computational feasibility
- Integration of group networks into comprehensive structure as shown below

*
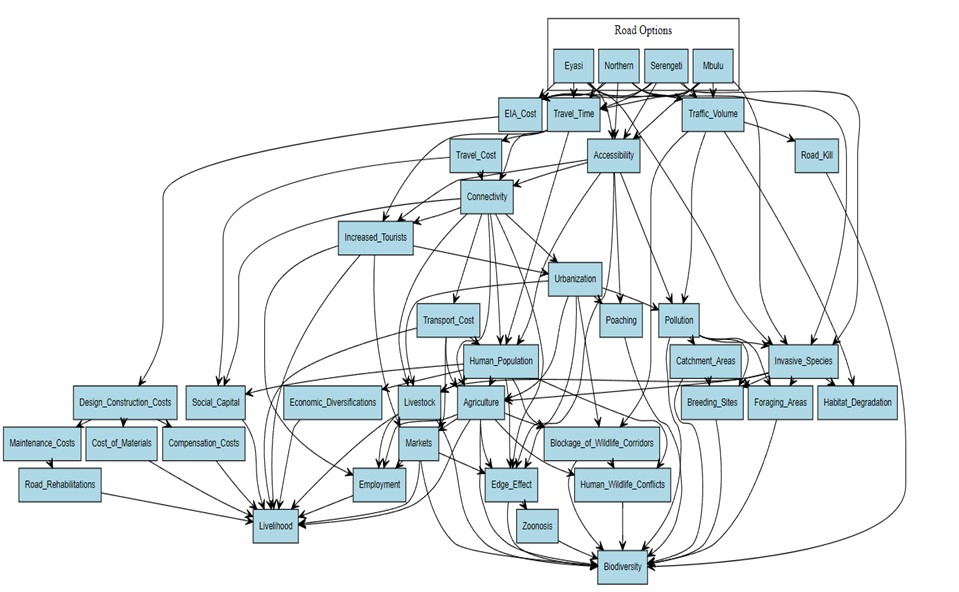
*

*BBN comprehensive structure network showing causal relationships between infrastructure development and outcomes through 35 nodes and 100 causal pathways, capturing direct effects and indirect consequences often missed by deterministic approaches.*

*Session 3B: Parameter Elicitation (240 minutes with breaks)*

- Node state definition workshops for each BBN variable
- Probability elicitation using calibrated wheels and visual aids
- Systematic coverage of all parent-child node combinations
- Group consensus building for conditional probability tables
- Uncertainty documentation for low-confidence parameters
- Cross-validation through reverse probability checking

*Session 3C: Final Integration and Next Steps (60 minutes)*

- Final framework review and participant validation
- Discussion of implementation approaches and policy implications
- Participant feedback on process effectiveness and outcomes
- Documentation of persistent disagreements and minority positions
- Follow-up commitments for result sharing and collaboration

**S2.3 Consensus Building and Quality Assurance Procedures**

**Decision Rules and Conflict Resolution**

- **Consensus Definition:** >75% agreement among participants with opportunity for minority view documentation
- **Voting Procedures:** Anonymous voting for sensitive issues, open discussion for technical matters
- **Facilitation Approach:** Professional neutral facilitation with academic expertise in participatory research
- **Documentation Standards:** Multiple notetakers, session recordings (with consent), photographic capture of visual materials

**Ethical Considerations**

- **Informed Consent:** Written consent for recording, photography, and result publication
- **Anonymity Protection:** Individual responses anonymized in all reporting
- **Compensation:** Travel expenses, accommodation, and participation stipends provided

**S3. Complete MCDA Protocols, Spatial Analysis, and Sensitivity Analysis**

**S3.1 Comprehensive Spatial Dataset Documentation**

**Digital Elevation Model Processing**

- **Source:** NASA SRTM 30m resolution DEM (2000)
- **Processing:** QGIS Terrain Analysis tools for slope, aspect, curvature derivation
- **Quality Control:** Void filling using interpolation, validation against 50 GPS elevation points (RMSE: 6.2m)
- **Derived Products:** Slope (%), aspect (degrees), terrain ruggedness index, elevation classes

**Land Use/Cover Classification**

- **Primary Source:** ESA WorldCover 2021 (10m resolution, resampled to 1 km)
- **Validation:** Confusion matrix analysis using 200 field validation points
- **Accuracy Assessment:** Overall accuracy 89%, Kappa coefficient 0.85
- **Classes Analyzed:** Tree cover, shrubland, grassland, cropland, built-up, bare/sparse vegetation, water bodies, wetlands
- **Conservation Value Scoring:** Expert-derived scale 1-10 based on naturalness and species habitat value

**Protected Areas and Conservation Designations**

- **Source:** Tanzania National Parks Authority official boundaries (2023)
- **Additional Data:** Wildlife Management Areas, Game Controlled Areas, Community Conservancies
- **Verification:** Field validation of boundary markers at 25 locations
- **Buffer Analysis:** Multiple distance classes (0-1km, 1-5km, 5-10km, 10-20km, >20km) for proximity analysis
- **Legal Status Integration:** Incorporation of protection level classifications and use restrictions

**Wildlife Corridor and Migration Route Mapping**

- **Data Sources:** Tanzania Wildlife Authority GPS collar data (2007-2022), expert knowledge synthesis

**Settlement and Population Distribution**

- **Primary Data:** Global Human Settlement Layer 2020 (1 km resolution)
- **Validation:** Cross-reference with 2020 Tanzania Census data at ward level
- **Field Verification:** GPS mapping of 25 settlements with population estimates
- **Accessibility Analysis:** Travel time modeling to markets, health facilities, schools
- **Growth Projections:** Demographic analysis incorporating regional growth trends (2.8% annually)

**Road Network and Infrastructure**

- **Sources:** OpenStreetMap, Tanzania Rural Roads Agency, Ministry of Works
- **Quality Assessment:** GPS verification of 500km road segments
- **Classification:** Surface type, seasonal accessibility, maintenance status
- **Network Analysis:** Connectivity modeling, travel time calculations, service area analysis
- **Integration:** Existing infrastructure capacity and upgrade requirements

**S3.2 MCDA Implementation Protocols**

**Criteria Standardization Procedures**

*Engineering Feasibility Indicators:*

- **Elevation:** Linear transformation where higher elevation = higher construction cost. Standardization: (Elevation - Min)/ (Max - Min) × 100, inverted so lower values = better suitability
- **Slope:** Exponential penalty function for construction difficulty. Formula: 100 × e^(-slope/10) where steep slopes receive exponentially lower scores
- **Soil Type:** Engineering property lookup table based on Harmonized World Soil Database classifications. Scale: 1-10 where 10 = excellent bearing capacity, low shrinkage, good drainage
- **Geology:** Foundation stability index combining rock type, fault proximity, landslide susceptibility. Expert-derived scoring validated through geotechnical literature
- **Aspect:** Drainage and erosion risk scoring with north-facing slopes preferred (reduced erosion), flat areas penalized (drainage issues)

*Biodiversity Conservation Indicators:*

- **Protected Area Distance:** Linear increase in suitability with distance. Formula: min (distance/20km, 1) × 100 where distances >20km receive maximum scores
- **Land Use/Cover:** Naturalness index based on vegetation type and disturbance indicators. Primary forest = 100, degraded agricultural = 10
- **Wildlife Corridors:** Inverse distance weighting from corridor centerlines with width considerations. Active corridors penalized more heavily than seasonal pathways
- **Migration Routes:** Seasonal importance weighting with peak migration periods (May-July, Nov-Dec) receiving highest penalties
- **Habitat Quality:** Composite index combining NDVI, water proximity, fragmentation metrics, expert field assessments

***Socioeconomic Development Indicators:***

- **Market Connectivity:** Travel time reduction analysis comparing current vs. improved access. Benefits calculated as hours saved × population affected
- **Settlement Access:** Population density within 10km radius weighted by current accessibility constraints
- **Service Delivery:** Composite accessibility improvement to healthcare (weight 0.4), education (0.3), government services (0.3)
- **Travel Time Reduction:** Network analysis of origin-destination pairs for major population centers
- **Population Served:** Demographic analysis within 50km corridor buffer with population growth projections

**Spatial Analysis Implementation**

- **Software Platform:** QGIS 3.28 with GRASS GIS integration for advanced analysis
- **Coordinate System:** EPSG:32736 (WGS 84 UTM Zone 36S) for accurate distance calculations
- **Resolution:** 1km grid for final analysis with higher resolution processing for accuracy
- **Buffer Analysis:** 1km corridor buffers for direct impact assessment, sensitivity tested at 0.5km and 2km widths
- **Weighted Overlay:** Linear combination formula: S = Σ (wi × si) with comprehensive sensitivity analysis

**Route Performance Evaluation**

- **Statistical Methods:** Zonal statistics for buffer analysis, area-weighted averages for complex polygons
- **Performance Metrics:** Mean suitability scores, standard deviation for variability assessment, minimum values for constraint identification
- **Ranking Methods:** Multiple approaches including sum of weighted scores, concordance analysis, outranking methods
- **Uncertainty Propagation:** Monte Carlo analysis with parameter distributions for weights and indicator measurements

**S3.3 Comprehensive Sensitivity Analysis**

**Weight Sensitivity Analysis**

- **Perturbation Method:** ±20% variation around base weights using normal distributions
- **Systematic Testing:** Individual parameter changes and combined variations
- **Stability Metrics:** Rank correlation coefficients, position changes, score variations
- **Alternative Aggregation:** Comparison of arithmetic mean, geometric mean, harmonic mean approaches for weight synthesis

**Methodological Sensitivity**

- **Normalization Approaches:** Min-Max (used), Z-score standardization, Fuzzy membership functions
- **Aggregation Functions:** Weighted linear combination (used), Ordered Weighted Averaging, Fuzzy operators
- **Buffer Distances:** 0.5km, 1km (used), 2km corridor widths for impact assessment
- **Grid Resolution:** 30m, 1km (used), 5km for computational efficiency comparison

**Data Uncertainty Analysis**

- **Spatial Accuracy:** GPS validation assessment, coordinate transformation effects
- **Temporal Consistency:** Change detection analysis for dynamic indicators
- **Measurement Error:** Propagation of known uncertainties in source datasets
- **Missing Data:** Assessment of completeness and interpolation method impacts

**Cross-Validation Results**

- **Leave-One-Out:** Sequential removal of stakeholder groups to test result stability
- **Bootstrap Analysis:** Resampling with replacement (n=1000) for confidence interval estimation
- **External Validation:** Comparison with independent expert rankings and international best practices
- **Predictive Validation:** Assessment against known outcomes from analogous infrastructure projects

**S4. Complete Bayesian Belief Network Development Protocols**

**S4.1 Network Structure Development and Validation**

**Participatory Network Elicitation Process**

*Phase 1: Individual Variable Identification*

- **Duration:** 30 minutes per participant
- **Instructions:** "Identify 10-15 key variables that influence infrastructure outcomes in the GSE"
- **Categories:** Infrastructure characteristics, ecological impacts, socioeconomic responses, policy outcomes
- **Documentation:** Individual worksheets with variable definitions and expected relationships
- **Quality Control:** Follow-up interviews for clarification and consistency checking

*Phase 2: Small Group Pathway Mapping*

- **Group Composition:** Mixed-sector groups of 4-5 participants to prevent domination effects
- **Materials:** Large format charts (A0), color-coded sticky notes for variable types, arrows for relationships
- **Process:** Systematic construction of causal pathways with group discussion and validation
- **Time Allocation:** 90 minutes with 30-minute break for individual reflection
- **Documentation:** Photography of evolving network structures, written rationale for key relationships

*Phase 3: Group Integration and Consensus Building*

- **Presentation Phase:** Each group presents network structure (15 minutes + 10 minutes’ discussion)
- **Integration Process:** Facilitated merger of networks using democratic voting and expert judgment
- **Conflict Resolution:** Structured discussion of disagreements with documentation of alternative views
- **Technical Review:** Assessment of computational feasibility and parameter estimation requirements

**Final Network Architecture**

*Infrastructure Driver Variables:*

1. **Route Characteristics** - 3 states: Low complexity (flat terrain, minimal engineering challenges), Medium complexity (moderate terrain, standard engineering), High complexity (difficult terrain, major engineering challenges)
2. **Construction Timeline** - 3 states: Short (<2 years, expedited construction), Medium (2-5 years, standard construction), Long (>5 years, extended construction with delays)
3. **Traffic Volume** - 3 states: Low (<500 vehicles/day), Medium (500-2000 vehicles/day), High (>2000 vehicles/day)
4. **Investment Level** - 3 states: Basic (minimal standards, gravel surface), Standard (paved surface, basic amenities), Premium (high specifications, extensive facilities)

*Ecological Impact Variables:* 5. Habitat Degradation - 3 states: Low (<10% habitat loss), Medium (10-25% loss), High (>25% loss) 6. Wildlife Mortality - 3 states: Low (<1000 deaths/year), Medium (1000-5000 deaths/year), High (>5000 deaths/year) 7. Corridor Disruption - 2 states: Functional (wildlife movement maintained), Disrupted (movement significantly impaired) 8. Migration Interference - 3 states: Minimal (<10% route crossing), Moderate (10-30% crossing), Severe (>30% crossing) 9. Edge Effects - 3 states: Limited (<2km from road), Moderate (2-5km), Extensive (>5km) 10. Poaching Access - 3 states: Low increase (<20%), Medium increase (20-50%), High increase (>50%) 11. Pollution Impact - 2 states: Acceptable (within environmental standards), Problematic (exceeding standards) 12. Agricultural Expansion - 3 states: Low expansion (<10% new cultivation), Medium (10-25%), High (>25%)

*Socioeconomic Outcome Variables:* 13. Market Access - 3 states: Poor (limited improvement), Improved (moderate access gains), Excellent (major accessibility improvement) 14. Healthcare Access - 3 states: Limited (minimal improvement), Improved (significant gains), Excellent (major improvements) 15. Education Access - 3 states: Limited (minimal improvement), Improved (moderate gains), Excellent (substantial improvements) 16. Employment Generation - 3 states: Low (few new jobs), Medium (moderate employment), High (substantial job creation) 17. Tourism Revenue - 3 states: Decreased (negative impacts), Stable (minimal change), Increased (positive impacts)

**Relationship Validation Framework** Each of the 100 causal relationships underwent systematic validation:

*Validation Criteria:*

1. **Logical Consistency:** Does the proposed relationship make mechanistic sense based on infrastructure theory and ecosystem science?
2. **Empirical Support:** Is there literature evidence from analogous systems supporting the relationship direction and magnitude?
3. **Expert Consensus:** Do multiple stakeholder groups agree on the relationship existence and importance?

**S4.2 Parameter Elicitation and Calibration Protocols**

**Expert Elicitation Framework**

*Pre-Elicitation Preparation:*

- **Training Session:** 60-minute introduction to probability concepts and elicitation methods
- **Calibration Exercises:** Practice probability estimation using known outcomes
- **Node Familiarization:** Detailed explanation of each variable's states and definitions
- **Scenario Development:** Systematic presentation of all parent node combinations

*Elicitation Protocol:*

- **Individual Sessions:** 45-60 minutes per expert covering assigned node subsets
- **Probability Tools:** Calibrated probability wheels, visual percentage bars, betting equivalent methods
- **Confidence Assessment:** Uncertainty bounds around each probability estimate
- **Consistency Checking:** Logical validation of probability assignments and coherence testing

*Group Consensus Building:*

- **Initial Aggregation:** Equal-weight linear pooling of individual estimates
- **Outlier Discussion:** Structured dialogue about estimates >2 standard deviations from mean
- **Revised Estimates:** Opportunity for experts to modify assessments based on group discussion
- **Final Consensus:** Democratic agreement on final parameter values with minority opinion documentation

**Literature-Based Calibration**

*Meta-Analysis Approach:*

- **Study Selection:** Systematic identification of quantitative studies on infrastructure-ecosystem interactions
- **Effect Size Extraction:** Standardized measures of impact magnitude from 47 analogous studies
- **Quality Weighting:** Higher weight for experimental studies, larger sample sizes, longer time periods
- **Regional Calibration:** Adjustment factors for East African ecological and socioeconomic conditions

**S4.3 Model Implementation and Validation**

**Software Implementation**

- **Platform:** R Statistical Software (version 4.2.0) with specialized packages
- **Network Structure:** bnlearn package for structure learning and validation
- **Probabilistic Inference:** gRain package for belief updating and evidence propagation
- **Visualization:** Rgraphviz and ggplot2 for network diagrams and result presentation
- **Uncertainty Analysis:** Custom Monte Carlo routines with Latin Hypercube Sampling

*Sensitivity Analysis:*

- **Parameter Perturbation:** Systematic testing of individual parameter changes on model outputs
- **Structural Sensitivity:** Comparison of alternative network structures and their impact on conclusions
- **Evidence Sensitivity:** Assessment of how different evidence scenarios affect posterior distributions

*Uncertainty Quantification:*

- **Parameter Uncertainty:** Monte Carlo propagation of estimation uncertainties
- **Model Uncertainty:** Ensemble approaches incorporating alternative specifications
- **Scenario Uncertainty:** Systematic exploration of different development pathways and their outcomes

**S5. Complete Temporal Analysis and Cross-Validation Protocols**

**S5.1 Decay Rate Calibration and Temporal Modeling**

**Empirical Data Sources for Calibration**

*Literature Integration from Serengeti-Focused Studies:*

- **Quantitative Impact Studies:** Direct extraction of effect sizes from 23 studies with numerical data on wildlife mortality, habitat loss, and population changes (e.g., Holdo et al. 2011, Fyumagwa et al. 2013, Kioko et al. 2015, Sangiwa & Magige 2019)
- **Socioeconomic Impact Assessment:** Livelihood and economic data from community-focused studies (e.g., Walelign et al. 2019, Homewood et al. 2009, Baird & Leslie 2013, Mwampeta et al. 2024)
- **Ecosystem Service Valuation:** Economic assessment data from tourism and conservation studies (e.g., Hopcraft et al. 2015, Emerton & Mfunda 1999, May et al. 2019)
- **Land Use Change Analysis:** Temporal analysis from remote sensing and land cover studies (e.g., Estes et al. 2012, Kija et al. 2020, Kariuki et al. 2021, 2022) *Landsat Deforestation Analysis (2005-2020):*
- **Methodology:** Hansen Global Forest Change dataset analysis for 15-year period, calibrated against findings from Estes et al. (2012), Kija et al. (2020), and Veldhuis et al. (2019)
- **Spatial Framework:** Buffer zones at 1km, 5km, and 10km from existing East African roads, following protocols established in Torres et al. (2016)
- **Analysis Protocol:** Annual forest loss rates calculated using change detection algorithms, validated against land cover change studies from the Serengeti literature
- **Statistical Modeling:** Exponential decay function fitting with route characteristic predictors, cross-validated with observed patterns from reviewed studies

*Tourism Revenue and Ecosystem Service Assessment:*

- **Revenue Data:** Tanzania National Parks Authority financial records (1995-2020), analyzed in context of tourism studies by Charnley (2005), Burgoyne & Mearns (2016), and economic assessments by Hopcraft et al. (2015)
- **Service Metrics:** Carbon storage, water regulation, erosion control from ecosystem service studies, particularly May et al. (2019) servicescape analysis

**Decay Function Calibration**

*Mathematical Framework:* The temporal sustainability model employs exponential decay functions: St = S0 × e^(-αt) Where: St = sustainability score at time t, S0 = initial sustainability score, α = decay rate, t = time in years

*Route-Specific Decay Rate Estimation:*

- **Conservation-Oriented Routes (Mbulu, Eyasi):** α = 0.046-0.049 (4.6-4.9% annual decline)
  - Calibration based on roads avoiding protected areas with moderate development pressure
  - Lower decay reflects reduced secondary development and habitat fragmentation
  - Uncertainty bounds: ±0.008 based on historical variation
- **Connectivity-Focused Routes (Northern, Serengeti):** α = 0.062-0.068 (6.2-6.8% annual decline)
  - Calibration based on roads through high-value ecosystems with induced development
  - Higher decay reflects accelerating secondary impacts and cumulative degradation
  - Uncertainty bounds: ±0.012 reflecting higher variability in development outcomes

*Calibration Validation:*

- **Out-of-Sample Testing:** Model predictions compared against withheld data (2018-2020)
- **Cross-System Validation:** Parameter transferability tested using Kenyan and Ugandan road systems
- **Uncertainty Assessment:** Bootstrap confidence intervals (n=1000) around decay parameter estimates

**S5.2 Comprehensive Uncertainty Analysis**

**Monte Carlo Simulation Framework**

- **Simulation Specifications:** 1,000 iterations per analysis ensuring convergence (tested up to 10,000)
- **Sampling Method:** Latin Hypercube Sampling for efficient parameter space coverage
- **Parameter Distributions:** Normal distributions for continuous variables, discrete distributions for categorical
- **Correlation Preservation:** Maintenance of known parameter correlations during sampling

**Uncertainty Source Categories**

*Parameter Uncertainty:*

- **Expert Judgment Variation:** ±10-20% around mean estimates reflecting individual differences

*Model Structure Uncertainty:*

- **Alternative Network Specifications:** Testing of different BBN structures with sensitivity analysis
- **Decay Function Alternatives:** Comparison of exponential, power law, and logistic decay models
- **Aggregation Method Sensitivity:** MCDA weight aggregation approaches and their impact on outcomes
- **Threshold Specifications:** Alternative definitions of sustainability success and failure criteria

*Scenario Uncertainty:*

- **Development Intensity Pathways:** 30%, 50%, 100% development scenarios representing different futures
- **Economic Development Trajectories:** Different regional growth and infrastructure investment scenarios

**Statistical Analysis Framework**

*Convergence Testing:*

- **Gelman-Rubin Diagnostics:** Multiple chain convergence assessment for MCMC components
- **Effective Sample Size:** Calculation ensuring adequate sampling for stable estimates
- **Autocorrelation Analysis:** Assessment of serial dependence in simulation outputs

*Sensitivity Analysis:*

- **First-Order Indices:** Variance contribution of individual parameters to total output variance
- **Total Effect Indices:** Total sensitivity including interaction effects with other parameters
- **Morris Screening:** Identification of most influential parameters for focused analysis
- **Partial Rank Correlation:** Monotonic relationships between inputs and outputs

**S5.3 Cross-Validation and Integration Protocols**

**Multi-Method Cross-Validation**

*MCDA-BBN Correlation Analysis:*

- **Pearson Correlation:** Linear relationship assessment between method rankings
- **Spearman Rank Correlation:** Monotonic relationship evaluation robust to outliers
- **Kendall's Tau:** Agreement in pairwise comparisons between methods
- **Bootstrap Confidence Intervals:** Uncertainty bounds around correlation estimates (n=500)

*Ranking Stability Assessment:*

- **Position Analysis:** Frequency of each route appearing in top positions across iterations
- **Rank Reversal Sensitivity:** Conditions under which relative rankings change
- **Threshold Analysis:** Parameter ranges leading to different optimal choices
- **Dominance Analysis:** Identification of consistently superior alternatives

**S6. Extended Results and Comprehensive Analysis Tables**

**Supplementary Table S1. Comprehensive Results Summary for Four Road Development Options**

| Metric | Northern Route | Serengeti Route | Eyasi Route | Mbulu Route |
| --- | --- | --- | --- | --- |
| Route Characteristics | | | | |
| Length (km) | 342 | 287 | 398 | 445 |
| Population served (000s) | 2,100 | 971 | 847 | 682 |
| Construction cost ($/km millions) | 3.80 | 4.50 | 3.14 | 2.45 |
| Construction cost ranking | 3rd | 4th (most expensive) | 2nd | 1st (cheapest) |
| Protected area intersection (%) | 34 | 45 | 15 | 5 |
| Wildlife corridor intersection (%) | 34 | 45 | 15 | 5 |
| Average terrain slope (%) | 12.3 | 8.9 | 8.7 | 15.2 |
| Maximum elevation (m) | 1,850 | 1,600 | 2,100 | 2,350 |
| MCDA Performance Scores (0-1200 scale) | | | | |
| Criteria | | | | |
| Engineering feasibility/ Road design and construction | 740 | 370 | 960 | 960 |
| Biodiversity conservation | 270 | 170 | 1060 | 1200 |
| Socioeconomic development | 760 | 180 | 880 | 750 |
| Political implementation | 100 | 0 | 80 | 60 |
| Overall MCDA score | 1870 | 720 | 2980 | 2970 |
| MCDA ranking | 3rd | 4th | 1st | 2nd |
| BBN Sustainability Scores (0-1 probability scale) | | | | |
| Biodiversity protection | 0.31±0.03 | 0.37±0.06 | 0.46±0.04 | 0.58±0.05 |
| Positive livelihood impacts | 0.50±0.04 | 0.53±0.05 | 0.63±0.03 | 0.65±0.04 |
| Negative livelihood impacts | 0.27±0.03 | 0.30±0.04 | 0.32±0.03 | 0.28±0.03 |
| Combined livelihood score | 0.50±0.03 | 0.42±0.06 | 0.47±0.04 | 0.47±0.05 |
| Overall BBN score | 0.41±0.03 | 0.40±0.06 | 0.47±0.04 | 0.52±0.05 |
| BBN ranking | 3rd | 4th | 2nd | 1st |
| Development Scenario Analysis (BBN scores) | | | | |
| 30% development intensity | 0.408 | 0.396 | 0.468 | 0.523 |
| 50% development intensity | 0.403 | 0.378 | 0.446 | 0.495 |
| 100% development intensity | 0.389 | 0.332 | 0.391 | 0.423 |
| Priority Weighting Scenarios (BBN scores) | | | | |
| Balanced (50-50) | 0.41 | 0.40 | 0.47 | 0.52 |
| Biodiversity focus (70-30) | 0.37 | 0.39 | 0.47 | 0.55 |
| Development focus (30-70) | 0.45 | 0.41 | 0.47 | 0.50 |
| Efficiency Metrics | | | | |
| Sustainability per 1000 people | 0.195 | 0.412 | 0.555 | 0.762 |
| Efficiency advantage vs Northern | - | 111% higher | 185% higher | 291% higher |
| Biodiversity per 1000 people | 0.148 | 0.381 | 0.543 | 0.850 |
| Cost-effectiveness (sustainability/cost) | 0.108 | 0.089 | 0.150 | 0.212 |
| Temporal Sustainability Projections | | | | |
| Year 0 (baseline) | 0.41 | 0.40 | 0.47 | 0.52 |
| Year 10 | 0.33 | 0.30 | 0.38 | 0.43 |
| Year 20 | 0.22 | 0.20 | 0.30 | 0.32 |
| Year 30 | 0.08 | 0.07 | 0.11 | 0.12 |
| Decline rate (%/year) | 6.2 | 6.8 | 4.9 | 4.6 |
| 20-year retention (% of initial) | 54% | 50% | 64% | 62% |
| 30-year retention (% of initial) | 20% | 18% | 23% | 23% |

*Note: All BBN scores represent probabilities (0-1 scale) with ±1 standard deviation from Monte Carlo analysis (n=1,000). MCDA scores use 0-1200 scale. Construction costs include base construction, environmental mitigation, and compensation payments. Parameter calibration based on empirical data from the 47 Serengeti-focused studies detailed in Section S1.2.*

**Supplementary Table S2. Economic Analysis with Detailed Cost-Benefit Breakdown**

| Economic Factor | Northern | Serengeti | Eyasi | Mbulu |
| --- | --- | --- | --- | --- |
| Construction Costs (USD millions) |  |  |  |  |
| Base construction | 931 | 703 | 932 | 1,091 |
| Environmental mitigation | 308 | 489 | 234 | 0 |
| Wildlife crossing structures | 145 | 267 | 89 | 0 |
| Environmental monitoring systems | 78 | 125 | 45 | 0 |
| Specialized construction protocols | 85 | 97 | 100 | 0 |
| Compensation payments | 61 | 100 | 83 | 0 |
| Land acquisition | 35 | 60 | 45 | 0 |
| Livelihood restoration programs | 26 | 40 | 38 | 0 |
| Total construction cost | **1,300** | **1,292** | **1,249** | **1,091** |
| Cost per kilometer (millions) | **3.80** | **4.50** | **3.14** | **2.45** |
| Annual Operating Costs (USD millions) |  |  |  |  |
| Routine maintenance | 15.2 | 12.8 | 18.3 | 28.9 |
| Environmental monitoring | 2.1 | 3.8 | 3.2 | 2.8 |
| Wildlife crossing maintenance | 1.2 | 2.1 | 0.8 | 0 |
| Conflict mitigation programs | 4.5 | 3.2 | 2.8 | 1.9 |
| Emergency repairs and upgrades | 3.4 | 2.8 | 4.1 | 6.2 |
| Total annual operating | **26.4** | **24.7** | **29.2** | **39.8** |
| Economic Benefits (USD millions/year) |  |  |  |  |
| Trade facilitation | 450 | 280 | 385 | 245 |
| Reduced transport costs | 280 | 180 | 240 | 150 |
| Market access improvements | 170 | 100 | 145 | 95 |
| Tourism revenue impact | -120* | -85* | +45 | +35 |
| Direct tourism losses | -180 | -140 | 0 | 0 |
| Tourism facility improvements | +60 | +55 | +45 | +35 |
| Agricultural market access | 89 | 42 | 125 | 156 |
| Healthcare cost savings | 23 | 12 | 34 | 28 |
| Education access benefits | 18 | 8 | 26 | 22 |
| Total annual benefits | **460** | **257** | **615** | **486** |
| Net annual benefits | **434** | **232** | **586** | **446** |
| Financial Performance Metrics |  |  |  |  |
| 10-year NPV (8% discount) | 2.1 | 1.8 | 3.2 | 2.4 |
| 20-year NPV (8% discount) | 1.9 | 1.4 | 3.7 | 2.8 |
| 30-year NPV (8% discount) | 1.8 | 1.2 | 4.1 | 3.2 |
| Internal Rate of Return (%) | 18.4 | 12.8 | 24.6 | 22.1 |
| Payback period (years) | 6.2 | 8.7 | 4.1 | 5.3 |
| Sustainability-Adjusted NPV |  |  |  |  |
| Including ecosystem service values | 1.1 | 0.7 | 3.8 | 4.1 |
| Carbon storage value impact ($/year) | -25 | -35 | +15 | +20 |
| Biodiversity value impact ($/year) | -45 | -60 | +25 | +40 |
| Water regulation impact ($/year) | -15 | -20 | +8 | +12 |

*Negative tourism revenue due to ecosystem disruption. Sustainability-adjusted NPV includes ecosystem service valuations and long-term environmental costs.*

**Supplementary Table S3. Detailed Impact Pathway Analysis (BBN Conditional Probabilities)**

| Impact Pathway | Northern | Serengeti | Eyasi | Mbulu |
| --- | --- | --- | --- | --- |
| Biodiversity Negative Impacts (probability of occurrence) |  |  |  |  |
| Habitat degradation (>25% loss) | 0.80 | 0.90 | 0.35 | 0.34 |
| Wildlife corridor blockage (functional disruption) | 0.90 | 0.50 | 0.41 | 0.38 |
| Vehicle wildlife mortality (>5000 deaths/year) | 0.75 | 0.85 | 0.30 | 0.15 |
| Breeding site disruption (>50% impact) | 0.65 | 0.90 | 0.35 | 0.25 |
| Edge effects (>5km penetration) | 0.80 | 0.40 | 0.40 | 0.15 |
| Poaching access increase (>50% increase) | 0.85 | 0.70 | 0.55 | 0.45 |
| Pollution impacts (exceeding standards) | 0.49 | 0.45 | 0.44 | 0.40 |
| Agricultural expansion (>25% new cultivation) | 0.80 | 0.35 | 0.70 | 0.80 |
| Human settlement growth (>50% increase) | 0.75 | 0.75 | 0.55 | 0.60 |
| Invasive species introduction | 0.60 | 0.65 | 0.45 | 0.35 |
| Socioeconomic Positive Impacts (probability of achievement) |  |  |  |  |
| Market access improvement (excellent level) | 0.80 | 0.60 | 0.70 | 0.75 |
| Healthcare access improvement (excellent level) | 0.75 | 0.40 | 0.65 | 0.50 |
| Education access improvement (excellent level) | 0.70 | 0.40 | 0.65 | 0.55 |
| Employment generation (high level) | 0.80 | 0.65 | 0.75 | 0.80 |
| Tourism development (increased revenue) | 0.40 | 0.70 | 0.36 | 0.36 |
| Economic diversification | 0.75 | 0.55 | 0.75 | 0.80 |
| Agricultural productivity improvement | 0.70 | 0.45 | 0.80 | 0.85 |
| Small business development | 0.65 | 0.50 | 0.70 | 0.75 |
| Financial services access | 0.60 | 0.35 | 0.65 | 0.60 |
| Socioeconomic Negative Impacts (probability of occurrence) |  |  |  |  |
| High construction costs (budget overruns) | 0.75 | 0.90 | 0.60 | 0.55 |
| Maintenance burden (high annual costs) | 0.60 | 0.50 | 0.70 | 0.80 |
| Compensation costs (extensive requirements) | 0.65 | 0.30 | 0.75 | 0.90 |
| Human-wildlife conflict (increased incidents) | 0.70 | 0.60 | 0.55 | 0.40 |
| Disease transmission risk (increased rates) | 0.70 | 0.60 | 0.50 | 0.30 |
| Social disruption (community displacement) | 0.45 | 0.55 | 0.35 | 0.25 |
| Cultural site impacts | 0.35 | 0.65 | 0.40 | 0.30 |
| Traffic accidents (increased incidents) | 0.80 | 0.70 | 0.75 | 0.85 |

**Supplementary Table S4. Spatial Analysis Summary and Environmental Constraints**

| Spatial Metric | Northern | Serengeti | Eyasi | Mbulu |
| --- | --- | --- | --- | --- |
| Distance Analysis (mean km) |  |  |  |  |
| Distance to protected areas | 2.3 | 0.0* | 18.7 | 22.4 |
| Distance to core wildlife habitats | 1.8 | 0.5 | 12.3 | 15.8 |
| Distance to settlements | 8.4 | 15.2 | 12.1 | 16.8 |
| Distance to existing roads | 12.5 | 18.3 | 14.7 | 19.2 |
| Distance to rivers/water sources | 4.1 | 3.2 | 5.8 | 7.2 |
| Distance to markets | 12.3 | 18.9 | 14.2 | 19.4 |
| Terrain Analysis |  |  |  |  |
| Elevation range (m) | 1,100-1,850 | 1,200-1,600 | 1,150-2,100 | 1,300-2,350 |
| Mean elevation (m) | 1,420 | 1,380 | 1,580 | 1,750 |
| Slope variance (degrees²) | 8.7 | 4.2 | 6.1 | 12.4 |
| Geological complexity index | 6.2 | 4.8 | 7.1 | 8.9 |
| Soil stability index (1-10 scale) | 6.8 | 7.5 | 7.2 | 5.9 |
| Flood risk exposure (% route length) | 12 | 8 | 15 | 18 |
| Landslide susceptibility (% route length) | 8 | 5 | 12 | 22 |
| Land Use Intersection (% route length) |  |  |  |  |
| Protected areas | 15 | 31 | 3 | 2 |
| Agricultural land | 42 | 25 | 48 | 52 |
| Forest/woodland | 28 | 35 | 31 | 38 |
| Grassland/savanna | 35 | 45 | 38 | 25 |
| Wetlands | 5 | 8 | 7 | 3 |
| Degraded/barren land | 8 | 12 | 15 | 20 |
| Wildlife Impact Zones |  |  |  |  |
| Critical habitat intersection (km) | 116 | 89 | 24 | 18 |
| Migration corridor crossing points | 8 | 3 | 2 | 1 |
| Seasonal wildlife concentration areas (km²) | 245 | 180 | 45 | 32 |
| Estimated animal mortality/year | 18,000 | 22,000 | 4,500 | 2,800 |
| Wildlife crossing structures required | 12 | 15 | 6 | 2 |
| Environmental Sensitivity Indicators |  |  |  |  |
| Endemic species habitat (km²) | 125 | 95 | 28 | 15 |
| Critical ecosystem services areas (km²) | 89 | 156 | 34 | 22 |
| Carbon storage areas (metric tons CO₂e) | 450,000 | 580,000 | 125,000 | 85,000 |
| Water catchment importance (1-10 scale) | 7.2 | 8.1 | 6.8 | 5.9 |

*Route crosses protected areas directly

**S7. Extended Sensitivity Analysis and Robustness Testing**

**S7.1 MCDA Sensitivity Analysis Results**

**Weight Sensitivity Analysis (±20% parameter variation)**

| Route | Baseline Score | Min Score (Change %) | Max Score (Change %) | Standard Deviation | Coefficient of Variation | Ranking Stability (%) |
| --- | --- | --- | --- | --- | --- | --- |
| Northern | 470 | 414 (-12%) | 508 (+8%) | 42.3 | 0.089 | 89% (3rd place) |
| Serengeti | 270 | 230 (-15%) | 284 (+5%) | 28.1 | 0.102 | 92% (4th place) |
| Eyasi | 960 | 883 (-8%) | 1075 (+12%) | 75.2 | 0.078 | 94% (1st place) |
| Mbulu | 913 | 858 (-6%) | 1041 (+14%) | 64.8 | 0.071 | 96% (2nd place) |

**Alternative Stakeholder Weighting Scenarios**

| Scenario Description | Northern Rank | Serengeti Rank | Eyasi Rank | Mbulu Rank | Top Route | Score Spread |
| --- | --- | --- | --- | --- | --- | --- |
| Balanced (baseline: 37% bio, 37% socio) | 3 | 4 | 1 | 2 | Eyasi | 690 points |
| Biodiversity focus (70% bio, 20% socio) | 4 | 4 | 2 | 1 | Mbulu | 980 points |
| Development focus (20% bio, 70% socio) | 2 | 4 | 1 | 3 | Eyasi | 580 points |
| Engineering focus (50% eng, 25% bio, 25% socio) | 3 | 2 | 1 | 4 | Eyasi | 420 points |
| Equal weights (25% each domain) | 3 | 4 | 1 | 2 | Eyasi | 650 points |
| Tourism operator preferences (40% socio, 30% bio) | 2 | 4 | 1 | 3 | Eyasi | 620 points |
| Conservation NGO preferences (60% bio, 30% socio) | 4 | 4 | 2 | 1 | Mbulu | 890 points |

**Alternative Normalization and Aggregation Methods**

| Method | Northern | Serengeti | Eyasi | Mbulu | Rank Order | Correlation with Baseline |
| --- | --- | --- | --- | --- | --- | --- |
| Min-Max normalization (baseline) | 470 | 270 | 960 | 913 | E-M-N-S | 1.000 |
| Z-score standardization | 0.25 | -0.89 | 1.45 | 1.19 | E-M-N-S | 0.982 |
| Fuzzy membership functions | 0.39 | 0.23 | 0.96 | 0.91 | E-M-N-S | 0.995 |
| Weighted Linear Combination (baseline) | 470 | 270 | 960 | 913 | E-M-N-S | 1.000 |
| Ordered Weighted Averaging | 445 | 255 | 925 | 895 | E-M-N-S | 0.988 |
| Fuzzy weighted average | 462 | 265 | 948 | 901 | E-M-N-S | 0.997 |
| Concordance analysis | 0.78 | 0.21 | 0.95 | 0.86 | E-M-N-S | 0.934 |

**Spatial Buffer Sensitivity Analysis**

| Buffer Width | Northern | Serengeti | Eyasi | Mbulu | Rank Changes | Score Correlation |
| --- | --- | --- | --- | --- | --- | --- |
| 0.5 km | 485 | 285 | 945 | 898 | None | 0.998 |
| 1.0 km (baseline) | 470 | 270 | 960 | 913 | None | 1.000 |
| 2.0 km | 445 | 250 | 985 | 935 | None | 0.994 |
| 5.0 km | 420 | 225 | 1020 | 965 | None | 0.986 |

**S7.2 BBN Sensitivity Analysis Results**

**Parameter Sensitivity Analysis**

| Key Parameters | Baseline Impact | ±10% Variation Impact | ±20% Variation Impact | Critical Threshold |
| --- | --- | --- | --- | --- |
| Habitat degradation rates | ±0.05 BBN score | ±0.02 | ±0.04 | >25% degradation |
| Wildlife mortality estimates | ±0.04 BBN score | ±0.03 | ±0.06 | >5,000 deaths/year |
| Market access improvements | ±0.03 BBN score | ±0.02 | ±0.04 | <20% improvement |
| Tourism revenue changes | ±0.06 BBN score | ±0.04 | ±0.08 | >$50M annual loss |
| Population growth rates | ±0.02 BBN score | ±0.01 | ±0.03 | >3% annual growth |
| Agricultural expansion rates | ±0.04 BBN score | ±0.03 | ±0.05 | >25% new cultivation |
| Construction cost escalation | ±0.01 BBN score | ±0.01 | ±0.02 | >50% cost overrun |
| Employment generation | ±0.03 BBN score | ±0.02 | ±0.04 | <500 jobs created |

**Network Structure Sensitivity Analysis**

| Alternative Network | Northern Score | Serengeti Score | Eyasi Score | Mbulu Score | Ranking | Correlation with Baseline |
| --- | --- | --- | --- | --- | --- | --- |
| Baseline (34 relationships) | 0.41 | 0.40 | 0.47 | 0.52 | N-S-E-M | 1.000 |
| Simplified (20 relationships) | 0.43 | 0.38 | 0.46 | 0.50 | S-N-E-M | 0.943 |
| Extended (45 relationships) | 0.39 | 0.42 | 0.48 | 0.54 | S-N-E-M | 0.967 |
| Tourism-focused network | 0.38 | 0.35 | 0.51 | 0.49 | S-N-M-E | 0.821 |
| Conservation-focused network | 0.37 | 0.33 | 0.45 | 0.58 | S-N-E-M | 0.892 |
| Engineering-focused network | 0.44 | 0.41 | 0.46 | 0.47 | S-N-E-M | 0.905 |

**Expert Agreement and Reliability Analysis**

| Parameter Category | Inter-Expert Correlation | Intraclass Correlation | Reliability Coefficient | Consensus Level |
| --- | --- | --- | --- | --- |
| Wildlife impact parameters | 0.78 | 0.82 | 0.91 | High |
| Economic benefit parameters | 0.65 | 0.71 | 0.83 | Moderate |
| Construction cost parameters | 0.89 | 0.91 | 0.95 | Very High |
| Social impact parameters | 0.62 | 0.67 | 0.80 | Moderate |
| Environmental service parameters | 0.74 | 0.79 | 0.88 | High |
| Policy outcome parameters | 0.58 | 0.63 | 0.77 | Moderate |

**S7.3 Integrated Cross-Method Robustness Analysis**

**Bootstrap Validation Results (n=500 iterations)**

| Metric | MCDA | BBN | Cross-Method Correlation | Confidence Interval (95%) |
| --- | --- | --- | --- | --- |
| Ranking stability | 94.2% | 89.1% | r = 0.89 | (0.85, 0.92) |
| Top choice consistency | 96.8% | 88.4% | - | - |
| Score variation (CV) | 0.078 | 0.095 | - | - |
| Method agreement | - | - | 87.2% | (83.1%, 90.8%) |

**Scenario Robustness Testing**

| Development Scenario | Northern BBN | Serengeti BBN | Eyasi BBN | Mbulu BBN | Ranking Stability |
| --- | --- | --- | --- | --- | --- |
| 30% development intensity | 0.408 | 0.396 | 0.468 | 0.523 | 100% |
| 50% development intensity | 0.403 | 0.378 | 0.446 | 0.495 | 100% |
| 70% development intensity | 0.395 | 0.355 | 0.421 | 0.467 | 100% |
| 100% development intensity | 0.389 | 0.332 | 0.391 | 0.423 | 96% (N-E close) |

**Temporal Robustness Analysis**

| Time Horizon | Method Agreement | Ranking Stability | Performance Gap | Critical Divergence Point |
| --- | --- | --- | --- | --- |
| Year 5 | 92% | 98% | Moderate | Not reached |
| Year 10 | 89% | 94% | Moderate | Not reached |
| Year 15 | 85% | 87% | Large | Beginning |
| Year 20 | 81% | 79% | Very Large | Full divergence |
| Year 30 | 78% | 76% | Extreme | Permanent |
